# Supplementary material for: Insightful Valorization of the Biological Activities of Pani Heloch Leaves through Experimental and Computer-Aided Mechanisms
Source: PubMed Central journal article supplement (PMC7663931; doi:10.3390/molecules25215153), 2020-11-05
Supplement: molecules-25-05153-s001.pdf [file molecules-25-05153-s001.pdf]

## Supplementary Materials

Article

# Insightful Valorization of the Biological Activities of Pani Heloch Leaves through Experimental and Computer-aided Mechanisms

Naureen Banu <sup>1,†</sup>, Najmul Alam <sup>1,†</sup>, Mohammad Nazmul Islam <sup>1,†,\*</sup>, Sanjida Islam <sup>1</sup>, Shahenur Alam Sakib <sup>1,2</sup>, Nujhat Binte Hanif <sup>1</sup>, Md. Riad Chowdhury <sup>1</sup>, Abu Montakim Tareq <sup>1</sup>, Kamrul Hasan Chowdhury <sup>1</sup>, Shamima Jahan <sup>1</sup>, Afrina Azad <sup>3</sup>, Talha Bin Emran <sup>4,\*</sup> and Jesus Simal-Gandara <sup>5,\*</sup>

<sup>1</sup> Department of Pharmacy, International Islamic University Chittagong, Chittagong 4318, Bangladesh; naureen2021@gmail.com (N.B.); nazmul9alam@gmail.com (N.A.); sanjida.ru@outlook.com (S.I.); sakibhasaniiuc@gmail.com (S.A.S.); nujhataanchol@gmail.com (N.B.H.); riadchy01@gmail.com (M.R.C.); montakim0.abu@gmail.com (A.M.T.); kamrulhasan73132@gmail.com (K.H.C.); shamimaj058@gmail.com (S.J.)

<sup>2</sup> Department of Theoretical and Computational Chemistry, University of Dhaka, Dhaka 1000, Bangladesh

<sup>3</sup> Bangladesh Council of Scientific and Industrial Research (BCSIR), Dr. Qudrat-i-Khuda Road, Dhanmondi, Dhaka 1205, Bangladesh; afrina.ru.pharm@gmail.com

<sup>4</sup> Department of Pharmacy, BGC Trust University Bangladesh, Chittagong 4381, Bangladesh

<sup>5</sup> Nutrition and Bromatology Group, Department of Analytical and Food Chemistry, Faculty of Food Science and Technology, University of Vigo—Ourense Campus, E32004 Ourense, Spain

\* Correspondence: sayeadiiuc@gmail.com (M.N.I.); talhabmb@bgctub.ac.bd (T.B.E.); jsimal@uvigo.es (J.S.-G.); Tel.: +88-01674613722 (M.N.I.); +88-01819-942214 (T.B.E.); +34-988-387000 (J.S.G.)

† These authors contributed equally to this work.

Received: 11 October 2020; Accepted: 03 November 2020; Published: date

## **1. Qualitative Phytochemical Screening**

The qualitative phytochemical analysis of the *MEAM* was carried out by the standard methodology for testing the alkaloid, flavonoids, proteins, cholesterol, resins, phenols, terpenoids, steroids, emodins, tannins, and glycosides [1-3].

### *1.1. Test for Alkaloids*

Two milliliters of extract solution was added with the 2-3 drops of Mayer's reagent, whereas the white precipitates considered as the presence of alkaloids.

### *1.2. Test for Flavonoid*

One milliliter of extract solution was added with the few mL of lead acetate (10%) in a test tube, whereas the yellow precipitates indicated the presence of flavonoids.

### *1.3. Test for Proteins*

Two milliliter of extract solution was added with the two mL of water and few drops of conc.  $\text{HNO}_3$  in a test tube, whereas the yellow color indicated the presence of proteins.

### *1.4. Test for Cholesterol*

Two milliliter of extract solution was added with the two mL of  $\text{CHCl}_3$  and ten drops of acetic anhydride and 2-3 drops conc.  $\text{H}_2\text{SO}_4$  in a test tube, whereas the red-rose color indicated the presence of cholesterol.

### *1.5. Test for Resins*

One milliliter of extract solution was added with the few mL of  $\text{C}_4\text{H}_6\text{O}_3$  and 1 mL of conc.  $\text{H}_2\text{SO}_4$  in a test tube, whereas the conversation of orange to yellow color indicated the presence of resins.

### *1.6. Test for Phenols*

Five milliliter of extract solution was added with the 3 mL of lead acetate (10%) in a test tube and mixed very gently, whereas the white precipitates indicated the presence of phenols.

### *1.7. Test for Terpenoids*

Three milliliter of extract solution was added with the 1 mL of chloroform and 2 mL of conc.  $\text{H}_2\text{SO}_4$  in a test tube, whereas the reddish brown color indicated the presence of terpenoids.

### *1.8. Test for Steroids*

Two milliliter of extract with 2 ml of chloroform and 2 ml of concentrated  $\text{H}_2\text{SO}_4$  are added, the appearance of red color and yellowish green fluorescence indicates the presence of steroids.

### *1.9. Test for Emodins*

To 5ml of extract, 2ml of  $\text{NH}_3\text{OH}$  and 3ml of benzene are added. The production of red color indicates the presence of emodins.

### *1.10. Test for Tannins*

Five milliliters of extract solution was added with the few drops of ferric chloride solution (5%), whereas the dark green color considered as the presence of tannins.

### *1.11. Test for Glycosides*

The Borntrager's methodology was followed, whereas 2 mL of extract solution was added with 3 mL of chloroform and shaken well. After shaking, the layer of chloroform was separated and added ammonia solution (10%), whereas the pink color indicates the presence of glycosides.

## References

1. Auwal, M. S.; Saka, S.; Mairiga, I. A.; Sanda, K. A.; Shuaibu, A.; Ibrahim, A., Preliminary phytochemical and elemental analysis of aqueous and fractionated pod extracts of *Acacia nilotica* (Thorn mimosa). *Vet Res Forum* **2014**, *5*, (2), 95-100.
2. Evans, W. C., *Trease and Evans' Pharmacognosy E-book*. Elsevier Health Sciences: 2009.
3. Hossain, M. S.; Reza, A.; Rahaman, M. M.; Nasrin, M. S.; Rahat, M. R. U.; Islam, M. R.; Uddin, M. J.; Rahman, M. A., Evaluation of morning glory (*Jacquemontia tamnifolia* (L.) Griseb) leaves for antioxidant, antinociceptive, anticoagulant and cytotoxic activities. *J Basic Clin Physiol Pharmacol* **2018**, *29*, (3), 291-299.
